# Supplementary material
Source: PubMed Central journal article supplement (PMC6141344)
Supplement: NIHMS971234-supplement.pdf [file NIHMS971234-supplement.pdf]

## Supplemental Figure Legends

Figure S1. Species, isotype, ELISA binding and EM and alanine-scanning assignment of epitopes, related to Figure 1. Antibody binding to EBOV GP lacking the transmembrane domain or the indicated regions illustrated in Figure 1 was assessed by ELISA and categorized as strong, moderate or weak. Epitopes were confirmed or assigned using ELISA results combined with alanine-scanning and/or electron microscopy results for the indicated antibodies. Isotype nd: not determined.

Figure S2. Neutralization of rVSV-EBOV by epitope class, related to Figure 2. Mean  $\pm$  SD for three replicates are shown. No antibodies in the mucin class exhibited neutralization activity in this assay and this class is not shown.

Figure S3. Survival curves for *in vivo* protection assay, related to Figure 3. Antibodies tested at USAMRIID facilities were assayed in 12 rounds. The mice were treated with 100  $\mu$ g/ml antibodies on day 2 post-infection and were observed and weighed across a 28 day period. Antibodies tested at Public Health Agency of Canada (Manitoba) were tested in one round. The mice were treated with 100  $\mu$ g/ml antibodies on day 2 post-infection and observed for a total of 21 days.

Figure S4. MAb binding to wild-type (WT) and mouse-adapted full-length EBOV GP, related to Figure 3. MAbs from K-means cluster groups 1, 2, 4, and 5 (Figure 4) were tested for binding with both WT and mouse adapted EBOV GP. The mAbs included Cluster 1 MAb VIC 115, which protected *in vivo* but did not neutralize. HEK-293T cells were transfected with constructs expressing wild-type GP, mouse-adapted GP, or empty vector, and mAb binding was detected by flow cytometry, as described for alanine scanning epitope mapping. Data shown are the average and standard deviation of four measurements of binding, expressed as relative light units (RLU).

Figure S5. Parametric ANOVA analysis of correlations between epitope class and phagocytosis assay readouts and polyfunctionality, related to Figure 6. Black and white lines indicate mean values. (A) The mean huADCP activity for both mucin and cap was significantly higher than fusion, GP1/2, GP1/Core and unknown (p values ranged from  $4.2 \times 10^{-4}$ -0.039 and  $7.9 \times 10^{-4}$ -0.04, respectively), whereas base was significantly higher than GP1/2 (p=0.02). (B) For mADCP activity, mucin had the highest mean value and was significantly higher than that of all other antibody classes (\*, p values

ranged from  $9.3 \times 10^{-4}$ -0.034), and cap was significantly higher than GP1/Core, GP1/2, fusion and base (●, p values ranged from 0.03 to 0.048). (C, D) The mucin group had the highest mean value for both huADNP and mADNP assays (\*, p values ranged from  $1.2 \times 10^{-4}$ -0.042) and the other classes in Tier 1, cap (●) and GP1/Head (^) were higher than base (p=0.04) and base, GP1/2 and HR2 (p values ranging from 0.043 to 0.048), respectively. In the mADNP assay, the unknown class had a higher mean value than that for GP1/2 (p= $7.6 \times 10^{-3}$ ). (E) The mean value for mucin polyfunctionality was significantly higher than that for GP1/2 and GP1/Core antibodies (\*, p=0.0028 and 0.157, respectively) and the mean value for the Cap class was significantly higher than that for GP1/2 (●, p=0.007).

Figure S6. Glycan modification of VIC antibodies, related to Figure 7. The relative abundance of antibody glycan modifications was assessed. Of the 15 species and total amounts of G0, G1, G2, fucose, bisecting GlcNAc, sialic acid and mono-sialic acid, ANOVA identified (A) G0F, (B) G1F, (C) G1F', (D) G1FB and (E) total G0 as having a significant correlation with epitope class. Significant differences are indicated by bars with p values ranging between  $4.4 \times 10^{-4}$  and 0.049.

Figure S7. Machine learning algorithms and random forest regression predictions of protection, related to Figure 7. (A) Mean receiver operating characteristic curves of four machine learning algorithms (KNN: K-nearest neighbors; LR: Linear regression; RF: Random Forest; SVM: Support vector machine) trained and tested on dataset, D1, with raw neutralization readouts using a ten-fold cross validation scheme, related to Figure 7. Area under curve (AUC) values are shown in the legend. FPR: False positive rate; TPR: True positive rate. (B) Random forest regression predictions of protection using 10-fold cross validation; all antibody features were used as input for the predictions, related to Figure 7. The mean absolute error was 0.161. The importance factors of the top ten features used for the predictions are shown in Table S4.

## Supplemental Items

Table S1. ELISA EC<sub>50</sub> values for GPΔTM and sGP, related to Figure 1.

Table S2. Pan weights and testing round of EBOV-challenged mice, related to Figure 3

Table S3. Relative abundance of glycan modification of VIC panel antibodies, related to Figure 7

Table S4. Antibody features ranked by importance for predicting likelihood of protection, related to Figure 7.

Website: The correlation network may be accessed at: <https://apps.andersen-lab.com/cornnetwork/>

Figure S1



Figure S2



Figure S3



Figure S4



Figure S5

A



B



C



D



E



Figure S6



Figure S7

A



B



Table S1. ELISA EC<sub>50</sub> values for GPΔTM and sGP, related to Figure 1.

| VIC No. | Epitope  | GP EC50 <sup>a</sup> | sGP EC50 <sup>b</sup> | VIC No. | Epitope  | GP EC50 | sGP EC50 | VIC No. | Epitope  | GP EC50 | sGP EC50 |
|---------|----------|----------------------|-----------------------|---------|----------|---------|----------|---------|----------|---------|----------|
| 1       | Cap      | 1.38                 | 0.61                  | 57      | Unknown  | 14.95   | 1000     | 116     | GP1/Core | 30.27   | 2.81     |
| 2       | Mucin    | 0.91                 | 1000                  | 58      | Cap      | 4.29    | 3.72     | 117     | Cap      | 159.1   | 2.19     |
| 3       | Cap      | 175.8                | 22.19                 | 59      | Cap      | 5.11    | 6.05     | 118     | Cap      | 2.47    | 0.82     |
| 4       | Mucin    | 0.68                 | 1000                  | 60      | Unknown  | 5.8     | 1000     | 119     | GP1/Core | 8.08    | 3.16     |
| 5       | Cap      | 44.24                | 7.45                  | 61      | Cap      | 2.53    | 1.63     | 120     | GP1/2    | 6.12    | 1000     |
| 6       | Mucin    | 4.31                 | 1000                  | 62      | Cap      | 8.36    | 7.55     | 121     | Unknown  | 3.53    | 1000     |
| 7       | Unknown  | 2.77                 | 1000                  | 63      | GP1/Core | 118.1   | 11.33    | 122     | GP1/Head | 7.96    | 1.23     |
| 8       | Cap      | 216.6                | 5.38                  | 66      | Unknown  | 1.31    | 38.03    | 123     | Cap      | 4.89    | 3.06     |
| 9       | Mucin    | 9.05                 | 1000                  | 67      | GP1/Core | 3.97    | 0.87     | 124     | GP1/Core | 6.05    | 1.11     |
| 10      | GP1/Head | 21.64                | 3.52                  | 68      | Unknown  | 0.89    | 1000     | 125     | GP1/2    | 1000    | 1000     |
| 11      | Cap      | 219.6                | 5.56                  | 69      | Unknown  | 6.82    | 1000     | 126     | GP1/Core | 217.1   | 107.1    |
| 12      | Cap      | 5.47                 | 1000                  | 70      | Mucin    | 0.89    | 1000     | 127     | GP1/2    | 112.6   | 1000     |
| 13      | Unknown  | 6.06                 | 1000                  | 71      | Cap      | 36.59   | 0.39     | 128     | GP1/Core | 6.31    | 2.16     |
| 14      | Cap      | 7.42                 | 5.14                  | 72      | GP1/2    | 1000    | 1000     | 129     | GP1/Core | 7.99    | 8.04     |
| 15      | Base     | 45.74                | 1000                  | 73      | Cap      | 7.53    | 12.32    | 130     | GP1/Core | 9.16    | 1.32     |
| 16      | Fusion   | 765.4                | 1000                  | 74      | GP1/Core | 5       | 4.26     | 131     | GP1/Core | 136.3   | 14.06    |
| 17      | Unknown  | 264.4                | 1000                  | 75      | Fusion   | 13.77   | 1000     | 132     | GP1/2    | 29.93   | 1000     |
| 18      | Base     | 7.45                 | 1000                  | 76      | Base     | 29.91   | 1000     | 133     | Fusion   | 11.72   | 1000     |
| 19      | Unknown  | 1.31                 | 1000                  | 78      | GP1/2    | 1000    | 1000     | 134     | GP1/2    | 146.2   | 1000     |
| 20      | Cap      | 99.3                 | 2.62                  | 79      | Base     | 32.57   | 1000     | 135     | GP1/2    | 44.15   | 1000     |
| 21      | Mucin    | 3.14                 | 1000                  | 80      | Base     | 57.39   | 1000     | 136     | Base     | 5.07    | 1000     |
| 22      | Mucin    | 3.47                 | 1000                  | 81      | Cap      | 1.26    | 1.6      | 137     | Cap      | 12.74   | 0.27     |
| 23      | GP1/2    | 4.64                 | 1000                  | 82      | Cap      | 10.48   | 2.47     | 138     | GP1/Head | 1.62    | 0.23     |
| 24      | Base     | 6.11                 | 1000                  | 83      | GP1/Core | 1.75    | 1.94     | 139     | Cap      | 5.03    | 0.62     |
| 25      | Base     | 10.82                | 1000                  | 84      | GP1/Core | 3.34    | 95.54    | 140     | Base     | 4.92    | 1000     |
| 26      | Fusion   | 232.6                | 1000                  | 85      | GP1/Core | 13.71   | 3.23     | 141     | Cap      | 16.13   | 0.58     |
| 27      | Mucin    | 8.06                 | 1000                  | 86      | Unknown  | 2.29    | 1000     | 142     | Fusion   | 3.64    | 1000     |
| 28      | Mucin    | 4.27                 | 1000                  | 87      | Unknown  | 2.5     | 1000     | 143     | Mucin    | 1.39    | 1000     |
| 29      | Unknown  | 0.97                 | 1000                  | 88      | Cap      | 131.1   | 6.18     | 144     | GP1/Core | 4.58    | 0.4      |
| 30      | Unknown  | 7.43                 | 1000                  | 89      | Unknown  | 1000    | 1000     | 145     | Cap      | 2.65    | 0.52     |
| 31      | GP1/Core | 7.71                 | 3.78                  | 90      | Cap      | 25.35   | 2.55     | 146     | Cap      | 7.52    | 0.76     |
| 32      | Base     | 16.8                 | 1000                  | 91      | Cap      | 6.35    | 1.55     | 147     | GP1/Core | 2.9     | 0.44     |
| 33      | GP1/Core | 246.4                | 13.23                 | 92      | Unknown  | 13.42   | 1000     | 148     | Cap      | 83.5    | 3.44     |
| 34      | Unknown  | 1000                 | 1000                  | 93      | Cap      | 4.8     | 2.88     | 149     | Cap      | 5.45    | 0.48     |
| 35      | Cap      | 520.6                | 125.1                 | 94      | GP1/Head | 1.75    | 0.88     | 150     | GP1/Core | 4.81    | 0.52     |
| 36      | GP1/Core | 979.2                | 32.06                 | 95      | Cap      | 3.23    | 2.5      | 151     | Unknown  | 2.76    | 1000     |
| 37      | Mucin    | 2.36                 | 1000                  | 96      | GP1/Core | 10.99   | 2.64     | 152     | Cap      | 15.92   | 0.71     |
| 38      | Mucin    | 2.38                 | 1000                  | 97      | GP1/Core | 4.82    | 2.22     | 153     | GP1/2    | 3.58    | 1000     |
| 39      | Cap      | 842.4                | 1000                  | 98      | GP1/Core | 1000    | 186.2    | 154     | Cap      | 3.34    | 4.03     |
| 40      | Mucin    | 6.43                 | 1000                  | 99      | Mucin    | 5.56    | 940.6    | 155     | Cap      | 13.82   | 0.76     |
| 41      | Mucin    | 68.05                | 1000                  | 100     | HR2      | 0.73    | 1000     | 156     | Cap      | 1.75    | 4.13     |
| 42      | HR2      | 561.8                | 1000                  | 101     | Cap      | 14.3    | 2.97     | 157     | Fusion   | 7.14    | 1000     |
| 43      | Base     | 16.8                 | 1000                  | 102     | Cap      | 61.06   | 5.19     | 158     | Fusion   | 10.08   | 1000     |
| 44      | Mucin    | 6.27                 | 1000                  | 103     | HR2      | 6.03    | 1000     | 159     | Base     | 13.62   | 1000     |
| 45      | GP1/Core | 34.62                | 7.62                  | 104     | HR2      | 6.7     | 1000     | 160     | GP1/Head | 5.02    | 1.38     |
| 46      | Mucin    | 8.03                 | 1000                  | 105     | Unknown  | 6.86    | 1000     | 161     | HR2      | 2.89    | 1000     |
| 47      | Fusion   | 23.82                | 1000                  | 106     | Cap      | 227.8   | 24.46    | 162     | HR2      | 5.68    | 1000     |
| 48      | Mucin    | 71.59                | 1000                  | 107     | GP1/2    | 9.22    | 1000     | 163     | HR2      | 3.26    | 1000     |
| 49      | Unknown  | 4.9                  | 1000                  | 108     | Cap      | 18.82   | 2.29     | 164     | GP1/Core | 6.78    | 1.42     |
| 50      | GP1/2    | 9.56                 | 1000                  | 109     | GP1/2    | 28.14   | 1000     | 165     | GP1/Core | 11.98   | 1.61     |
| 51      | Mucin    | 4.39                 | 1000                  | 110     | Unknown  | 7.39    | 1000     | 166     | GP1/Core | 15.35   | 1.78     |
| 52      | Cap      | 22.28                | 4.43                  | 111     | GP1/2    | 8.92    | 1000     | 167     | GP1/Head | 4.74    | 1        |
| 53      | Unknown  | 1000                 | 1000                  | 112     | GP1/Core | 7.14    | 462.1    | 168     | GP1/Core | 6.52    | 1.78     |
| 54      | Mucin    | 5.17                 | 1000                  | 113     | GP1/Core | 14.69   | 1.9      | 169     | Base     | 49.43   | 1000     |
| 55      | GP1/2    | 3.11                 | 1000                  | 114     | GP1/Core | 28.03   | 3.99     | 170     | Base     | 2.72    | 1000     |
| 56      | Cap      | 32.07                | 5.04                  | 115     | GP1/Core | 9       | 1.67     | 171     | HR2      | 2.65    | 1000     |

<sup>a</sup>GP EC50 values are normalized such that 1000 indicates no binding to GPΔTM

<sup>b</sup>sGP EC50 values are normalized such that 1000 indicates no binding to sGP

Table S2. Pan weights and testing round of EBOV-challenged mice, related to Figure 3

| VIC No. | Max Wt. Loss (%) <sup>a</sup> | Round <sup>b</sup> | VIC No. | Max Wt. Loss (%) | Round   | VIC No. | Max Wt. Loss (%) | Round     |
|---------|-------------------------------|--------------------|---------|------------------|---------|---------|------------------|-----------|
| VIC 1   | 9                             | R4                 | VIC 57  | 11               | R1      | VIC 116 | 12               | R10       |
| VIC 2   | 20                            | R6                 | VIC 58  | 12               | R3      | VIC 117 | 12               | R10       |
| VIC 3   | 12                            | R2                 | VIC 59  | 17               | R5      | VIC 118 | 16               | R10       |
| VIC 4   | 14                            | R2                 | VIC 60  | 18               | R5      | VIC 119 | 18               | R10       |
| VIC 5   | 14                            | R1                 | VIC 61  | 16,10            | R1,PHAC | VIC 120 | 15               | PHAC      |
| VIC 6   | 10                            | R2                 | VIC 62  | 16               | R1      | VIC 121 | 11,9             | PHAC, R11 |
| VIC 7   | 8                             | R1                 | VIC 63  | 15               | R5      | VIC 122 | 13,12            | PHAC, R11 |
| VIC 8   | 22                            | R6                 | VIC 66  | 10               | R6      | VIC 123 | 29               | PHAC      |
| VIC 9   | 7                             | R1                 | VIC 67  | 18               | R6      | VIC 124 | 15               | PHAC      |
| VIC 10  | 32                            | R6                 | VIC 68  | 17               | R5      | VIC 125 | 25               | PHAC      |
| VIC 11  | 11                            | R4                 | VIC 69  | 21               | R5      | VIC 126 | 17,25            | PHAC, R11 |
| VIC 12  | 14                            | R1                 | VIC 70  | 22               | R1      | VIC 127 | 13               | PHAC      |
| VIC 13  | 24                            | R1                 | VIC 71  | 20               | R1      | VIC 128 | 12               | PHAC      |
| VIC 14  | 13                            | R1                 | VIC 72  | 10               | R1      | VIC 129 | 19               | PHAC      |
| VIC 15  | 16                            | R4                 | VIC 73  | 12               | R3      | VIC 130 | 9,4              | PHAC, R11 |
| VIC 16  | 13                            | R4                 | VIC 74  | 9                | R1      | VIC 131 | 20               | PHAC      |
| VIC 17  | 12                            | R4                 | VIC 75  | 13               | R5      | VIC 132 | 12               | PHAC      |
| VIC 18  | 13                            | R1                 | VIC 76  | 12               | R3      | VIC 133 | 9,6              | PHAC, R11 |
| VIC 19  | 12                            | R2                 | VIC 78  | 14,9             | R3,PHAC | VIC 134 | 21               | PHAC      |
| VIC 20  | 11                            | R1                 | VIC 79  | 8                | R5      | VIC 135 | 2                | PHAC      |
| VIC 21  | 14                            | R2                 | VIC 80  | 9                | R5      | VIC 136 | nt               | R11       |
| VIC 22  | 8                             | R2                 | VIC 81  | 10               | R5      | VIC 137 | 9                | PHAC      |
| VIC 23  | 14                            | R4                 | VIC 82  | 11               | R7      | VIC 138 | 10               | PHAC      |
| VIC 24  | 7                             | R2                 | VIC 83  | 12               | R7      | VIC 139 | 10               | PHAC      |
| VIC 25  | 16                            | R4                 | VIC 84  | 9                | R7      | VIC 140 | 9                | PHAC      |
| VIC 26  | 8                             | R6                 | VIC 85  | 21               | R7      | VIC 141 | 11               | PHAC      |
| VIC 27  | 15                            | R4                 | VIC 86  | 12               | R7      | VIC 142 | 3                | PHAC      |
| VIC 28  | 19                            | R4                 | VIC 87  | 11               | R7      | VIC 143 | 7                | PHAC      |
| VIC 29  | 15                            | R4                 | VIC 88  | 13               | R7      | VIC 144 | 9                | PHAC      |
| VIC 30  | 14                            | R1                 | VIC 89  | 10               | R7      | VIC 145 | 10               | PHAC      |
| VIC 31  | 16                            | R1                 | VIC 90  | 17               | R7      | VIC 146 | 14               | PHAC      |
| VIC 32  | 11                            | R1                 | VIC 91  | 13               | R8      | VIC 147 | 8                | PHAC      |
| VIC 33  | 17                            | R1                 | VIC 92  | 10               | R8      | VIC 148 | 21               | PHAC      |
| VIC 34  | 11                            | R2                 | VIC 93  | 15               | R8      | VIC 149 | 10               | PHAC      |
| VIC 35  | 14                            | R4                 | VIC 94  | 9,9              | R8,PHAC | VIC 150 | 13               | PHAC      |
| VIC 36  | 15                            | R2                 | VIC 95  | 15               | R8      | VIC 151 | 1                | PHAC      |
| VIC 37  | 16                            | R4                 | VIC 96  | 16               | R8      | VIC 152 | 14               | PHAC      |
| VIC 38  | 32                            | R6                 | VIC 97  | 19               | R8      | VIC 153 | 14               | PHAC      |
| VIC 39  | 11                            | R2                 | VIC 98  | 15               | R8      | VIC 154 | 16               | PHAC      |
| VIC 40  | 9                             | R2                 | VIC 99  | 13               | R8      | VIC 155 | 12               | PHAC      |
| VIC 41  | 20                            | R4                 | VIC 100 | 14               | R9      | VIC 156 | 13               | PHAC      |
| VIC 42  | 12                            | R6                 | VIC 101 | 13               | R9      | VIC 157 | 6                | R12       |
| VIC 43  | 11                            | R1                 | VIC 102 | 18               | R9      | VIC 158 | 7                | R12       |
| VIC 44  | 9                             | R6                 | VIC 103 | 14               | R9      | VIC 159 | 1                | R12       |
| VIC 45  | 18                            | R4                 | VIC 104 | 15               | R9      | VIC 160 | 10               | R12       |
| VIC 46  | 12                            | R4                 | VIC 105 | 12               | R9      | VIC 161 | 9                | R12       |
| VIC 47  | 27                            | R5                 | VIC 106 | 12               | R9      | VIC 162 | 5                | R12       |
| VIC 48  | 17                            | R6                 | VIC 107 | 8                | R9      | VIC 163 | 10               | R12       |
| VIC 49  | 22                            | R6                 | VIC 108 | 13               | R9      | VIC 164 | 9                | R12       |
| VIC 50  | 13                            | R2                 | VIC 109 | 13               | R9      | VIC 165 | 6                | R12       |
| VIC 51  | 10                            | R2                 | VIC 110 | 15               | R9      | VIC 166 | 4                | R12       |
| VIC 52  | 24                            | R2                 | VIC 111 | 15               | R9      | VIC 167 | 7                | R12       |
| VIC 53  | 18                            | R3                 | VIC 112 | 20               | R9      | VIC 168 | 8                | R12       |
| VIC 54  | 22                            | R5                 | VIC 113 | 14               | R9      | VIC 169 | 1                | R12       |
| VIC 55  | 18                            | R5                 | VIC 114 | 15               | R9      | VIC 170 | 4                | R12       |
| VIC 56  | 8                             | R3                 | VIC 115 | 8                | R10     | VIC 171 | 10               | R12       |

<sup>a</sup>Maximum percentage of weight loss at the end of the 28-day observation period

<sup>b</sup>Testing round at USAMRIID

Table S3. Relative abundance of glycan modification of VIC panel antibodies, related to Figure 7

| VIC Number | Epitope | Total G0 | Total G1 | Total G2 | Total Fucose | Total Bisecting | Total SA | G0    | G0F   | G0FB | G1   | G1'  | G1F   | G1F'  | G1S1F | G1FB | G2F   | G2FB | G2S1 | G2S1F | G2S1B | G2S1FB |
|------------|---------|----------|----------|----------|--------------|-----------------|----------|-------|-------|------|------|------|-------|-------|-------|------|-------|------|------|-------|-------|--------|
| 15         | Base    | 42.66    | 40.81    | 16.53    | 97.86        | 5.87            | 7.25     | 0.16  | 38.14 | 4.36 | 0.54 | 0.1  | 17.72 | 20.91 | 1.44  | 0.11 | 10.31 | 0.41 | 1.2  | 3.62  | 0.14  | 0.85   |
| 18         | Base    | 43.88    | 49.57    | 6.55     | 99.26        | 1.32            | 2.87     | 0.28  | 43.5  | 0.09 | 0.04 | 0.25 | 5.92  | 41.88 | 1.35  | 0.13 | 4.24  | 0.79 | 0.12 | 1.1   | 0.05  | 0.25   |
| 24         | Base    | 47.57    | 43.54    | 8.88     | 98.31        | 0.9             | 6.27     | 0.18  | 47.32 | 0.07 | 0.1  | 1.27 | 7.21  | 31.98 | 2.96  | 0.02 | 5.2   | 0.37 | 0.01 | 2.87  | 0.13  | 0.31   |
| 25         | Base    | 15.12    | 64.7     | 20.18    | 97.32        | 1               | 6.38     | 0.11  | 14.69 | 0.33 | 0.32 | 1.99 | 3.96  | 57.61 | 0.4   | 0.42 | 14.14 | 0.05 | 0.18 | 5.61  | 0.08  | 0.12   |
| 32         | Base    | 17.66    | 61.85    | 20.48    | 98.04        | 3.06            | 10.84    | 0.1   | 15.73 | 1.83 | 0.75 | 0.19 | 2.54  | 57.47 | 0.85  | 0.05 | 10.3  | 0.19 | 0.41 | 8.59  | 0.51  | 0.48   |
| 43         | Base    | 31.34    | 55.17    | 13.49    | 98.38        | 2.59            | 4.39     | 0.12  | 29.6  | 1.62 | 0.56 | 0.76 | 8.59  | 43.7  | 1.3   | 0.25 | 9.99  | 0.41 | 0.01 | 2.77  | 0.17  | 0.14   |
| 76         | Base    | 79.83    | 8.28     | 11.89    | 20.64        | 3.17            | 3.02     | 75.99 | 3.82  | 0.02 | 1.02 | 0.76 | 0.46  | 4.98  | 0.66  | 0.4  | 7.91  | 1.62 | 1.23 | 0     | 0.36  | 0.77   |
| 79         | Base    | 86.97    | 5.36     | 7.67     | 11.09        | 3.74            | 9.69     | 84.27 | 2.52  | 0.18 | 0.1  | 0.58 | 0.3   | 0.24  | 4     | 0.14 | 1.85  | 0.12 | 1.51 | 0.89  | 2.44  | 0.85   |
| 80         | Base    | 89.36    | 3.4      | 7.23     | 13.19        | 1.19            | 4.47     | 83.91 | 5.1   | 0.36 | 0.29 | 1.24 | 0.02  | 0.02  | 1.76  | 0.07 | 4.45  | 0.07 | 0.81 | 1.21  | 0.56  | 0.12   |
| 136        | Base    | 38.66    | 38.56    | 22.77    | 98.25        | 9.09            | 13.18    | 0     | 37.87 | 0.79 | 0.32 | 0.65 | 12.56 | 24.44 | 0.35  | 0.25 | 9.93  | 0.01 | 0.44 | 4.35  | 0.33  | 0.77   |
| 140        | Base    | 43.45    | 42.72    | 13.83    | 96.79        | 2.73            | 4.45     | 0     | 42.57 | 0.87 | 1.53 | 0.22 | 12.18 | 28.27 | 0.47  | 0.04 | 9.82  | 0.05 | 0.53 | 1.68  | 0.93  | 0.83   |
| 159        | Base    | 65.14    | 22.68    | 12.18    | 98           | 1.24            | 8.72     | 0.48  | 63.83 | 0.83 | 0.25 | 0.63 | 6.42  | 14.94 | 0.19  | 0.23 | 3.62  | 0.05 | 0.61 | 7.78  | 0.03  | 0.1    |
| 169        | Base    | 61.26    | 26.67    | 12.07    | 94.56        | 4.68            | 10.42    | 0.72  | 59.73 | 1.53 | 0.37 | 3.03 | 8.63  | 12.76 | 1.08  | 0.79 | 1.77  | 0.96 | 1.39 | 6.55  | 0.65  | 0.75   |
| 170        | Base    | 61.63    | 24.65    | 13.71    | 98.47        | 1.88            | 8.93     | 0.05  | 61.21 | 0.43 | 0.3  | 0.67 | 5.92  | 16.97 | 0.19  | 0.6  | 4.55  | 0.42 | 0.2  | 8.11  | 0.35  | 0.07   |
|            | MAX     | 89.36    | 64.7     | 22.77    | 99.26        | 9.09            | 13.18    | 84.27 | 63.83 | 4.36 | 1.53 | 3.03 | 17.72 | 57.61 | 4.00  | 0.79 | 14.14 | 1.62 | 1.51 | 8.59  | 2.44  | 0.85   |
|            | MIN     | 15.12    | 3.40     | 6.55     | 11.09        | 0.90            | 2.87     | 0.00  | 2.52  | 0.02 | 0.04 | 0.10 | 0.02  | 0.02  | 0.19  | 0.02 | 1.77  | 0.01 | 0.01 | 0.00  | 0.03  | 0.07   |
|            | MEDIAN  | 45.73    | 39.69    | 12.84    | 97.93        | 2.66            | 6.82     | 0.17  | 38.01 | 0.61 | 0.32 | 0.66 | 6.17  | 22.68 | 0.97  | 0.19 | 6.56  | 0.28 | 0.49 | 3.25  | 0.34  | 0.40   |
|            | MEAN    | 51.75    | 34.85    | 13.39    | 80.01        | 3.03            | 7.21     | 17.60 | 33.26 | 0.95 | 0.46 | 0.88 | 6.60  | 25.44 | 1.21  | 0.25 | 7.01  | 0.39 | 0.62 | 3.94  | 0.48  | 0.45   |
|            | STD DEV | 23.43    | 20.23    | 5.10     | 35.32        | 2.28            | 3.18     | 34.62 | 21.70 | 1.15 | 0.41 | 0.80 | 5.14  | 19.17 | 1.10  | 0.23 | 3.80  | 0.46 | 0.52 | 2.93  | 0.62  | 0.33   |

  

| VIC Number | Epitope | Total G0 | Total G1 | Total G2 | Total Fucose | Total Bisecting | Total SA | G0    | G0F   | G0FB | G1   | G1'  | G1F   | G1F'  | G1S1F | G1FB | G2F   | G2FB | G2S1 | G2S1F | G2S1B | G2S1FB |
|------------|---------|----------|----------|----------|--------------|-----------------|----------|-------|-------|------|------|------|-------|-------|-------|------|-------|------|------|-------|-------|--------|
| 1          | Cap     | 85.06    | 4.34     | 10.6     | 12.86        | 2.51            | 8.44     | 83.41 | 1.62  | 0.03 | 0.12 | 1.24 | 0.02  | 0.01  | 2.73  | 0.23 | 4.8   | 0.08 | 1.1  | 2.44  | 1.27  | 0.9    |
| 3          | Cap     | 55.52    | 31.83    | 12.66    | 98.14        | 0.81            | 13.02    | 0.67  | 54.38 | 0.47 | 0.33 | 0.8  | 2.46  | 26.51 | 1.62  | 0.11 | 1.2   | 0.06 | 0.05 | 11.17 | 0.01  | 0.16   |
| 5          | Cap     | 66.79    | 18.57    | 14.64    | 97.03        | 2.05            | 17.02    | 0.21  | 66.12 | 0.47 | 0.45 | 1.05 | 1.43  | 11.76 | 3.75  | 0.13 | 1     | 0.37 | 0.23 | 11.96 | 1.03  | 0.05   |
| 8          | Cap     | 38.7     | 44.58    | 16.72    | 94.93        | 3.46            | 14.14    | 1.16  | 36.51 | 1.04 | 2.23 | 1.03 | 2.61  | 36.18 | 2.16  | 0.38 | 3.79  | 0.95 | 0.4  | 10.48 | 0.26  | 0.84   |
| 11         | Cap     | 33.32    | 45.7     | 20.98    | 98.68        | 1.53            | 17.1     | 0.17  | 32.22 | 0.93 | 0.38 | 0.11 | 3.34  | 39.81 | 2.05  | 0.01 | 5.91  | 0.01 | 0.19 | 14.29 | 0.47  | 0.1    |
| 12         | Cap     | 61.73    | 18.84    | 19.43    | 95.63        | 1.47            | 21.92    | 0.93  | 60.27 | 0.54 | 1.33 | 0.69 | 1.84  | 11.92 | 3.02  | 0.04 | 0.4   | 0.13 | 0.85 | 17.28 | 0.57  | 0.19   |
| 14         | Cap     | 47.03    | 37.67    | 15.3     | 98.13        | 7.07            | 8.6      | 0.07  | 42.56 | 4.41 | 0.71 | 0.68 | 17.4  | 17.66 | 0.82  | 0.4  | 6.87  | 0.65 | 0.18 | 5.99  | 0.23  | 1.38   |
| 20         | Cap     | 42.68    | 44.92    | 12.41    | 99.22        | 0.41            | 6.74     | 0.1   | 42.35 | 0.22 | 0.25 | 0.35 | 8.09  | 35.46 | 0.7   | 0.07 | 6.32  | 0.04 | 0.01 | 5.95  | 0.07  | 0.01   |
| 35         | Cap     | 26.45    | 56.16    | 17.38    | 96.19        | 3.47            | 12.93    | 0.46  | 24.33 | 1.67 | 0.06 | 2.16 | 7.9   | 43.16 | 2.76  | 0.13 | 7.13  | 0.08 | 0.39 | 8.2   | 0.75  | 0.83   |
| 39         | Cap     | 38.74    | 47.7     | 13.56    | 97.73        | 1.52            | 15.92    | 0.08  | 37.88 | 0.77 | 0.51 | 1.52 | 13.12 | 23.79 | 8.57  | 0.19 | 5.81  | 0.4  | 0.06 | 7.13  | 0.09  | 0.07   |
| 52         | Cap     | 19.02    | 61.8     | 19.18    | 98.07        | 1.29            | 11.99    | 0.34  | 18.11 | 0.57 | 0.18 | 0.83 | 4.78  | 54.61 | 1.05  | 0.35 | 8.17  | 0.07 | 0.31 | 10.33 | 0.27  | 0.03   |
| 56         | Cap     | 8.56     | 72.53    | 18.91    | 97.88        | 2.03            | 4.22     | 0.41  | 7.53  | 0.63 | 0.1  | 1.08 | 4.55  | 66.43 | 0.16  | 0.22 | 14.26 | 0.58 | 0.29 | 3.16  | 0.24  | 0.36   |
| 58         | Cap     | 10.57    | 71.05    | 18.37    | 98.88        | 1.06            | 4.09     | 0.12  | 10.09 | 0.36 | 0.09 | 0.71 | 5.62  | 64.24 | 0.29  | 0.1  | 14.53 | 0.05 | 0.07 | 3.18  | 0.14  | 0.41   |
| 59         | Cap     | 35.86    | 50.45    | 13.69    | 97.96        | 1.57            | 5.06     | 0.87  | 34.76 | 0.22 | 0.02 | 0.56 | 7.78  | 39.9  | 2.14  | 0.05 | 9.97  | 0.81 | 0.2  | 2.23  | 0.38  | 0.11   |
| 61         | Cap     | 10.06    | 48.45    | 41.49    | 94.85        | 8.33            | 32.87    | 0.22  | 9.43  | 0.41 | 3.46 | 0.75 | 4.56  | 32.46 | 6.96  | 0.26 | 8.3   | 7.28 | 0.61 | 24.93 | 0.11  | 0.27   |
| 62         | Cap     | 29.51    | 59.24    | 11.25    | 98.7         | 0.19            | 3.38     | 0.09  | 29.35 | 0.07 | 0.74 | 0.38 | 5.57  | 51.48 | 1.02  | 0.04 | 8.87  | 0.02 | 0.07 | 2.23  | 0.01  | 0.05   |
| 71         | Cap     | 64.43    | 24.77    | 10.8     | 84.12        | 0.86            | 7.19     | 14.26 | 50.15 | 0.02 | 0.4  | 0.43 | 6.03  | 17.66 | 0.06  | 0.19 | 3.58  | 0.09 | 0.44 | 6.12  | 0.34  | 0.22   |
| 73         | Cap     | 53.9     | 35.07    | 11.02    | 98.25        | 1.21            | 7.96     | 0     | 53.16 | 0.75 | 0.47 | 1.24 | 17.71 | 14.08 | 1.48  | 0.09 | 4.45  | 0.1  | 0.01 | 6.19  | 0.03  | 0.25   |
| 81         | Cap     | 10.26    | 58.02    | 31.73    | 95.16        | 1.51            | 7.94     | 2.5   | 7.36  | 0.4  | 0.44 | 1.1  | 4.99  | 50.47 | 0.66  | 0.37 | 24.36 | 0.09 | 0.56 | 6.07  | 0.25  | 0.4    |
| 82         | Cap     | 30.24    | 51.24    | 18.52    | 98.35        | 4.29            | 2.4      | 0.37  | 28.75 | 1.13 | 0.03 | 0.32 | 14.71 | 33.99 | 0.2   | 1.99 | 15.65 | 0.67 | 0.69 | 1.02  | 0.25  | 0.25   |
| 88         | Cap     | 32.24    | 47.56    | 20.19    | 94.25        | 5.21            | 0.64     | 4.01  | 26.07 | 2.16 | 0.89 | 0.81 | 18.75 | 24.85 | 0.01  | 2.24 | 19.22 | 0.35 | 0.01 | 0.16  | 0.02  | 0.43   |
| 90         | Cap     | 33.48    | 47.49    | 19.03    | 94.93        | 5.17            | 4.55     | 1.62  | 31.2  | 0.66 | 0.38 | 0.84 | 16.74 | 26.63 | 0.61  | 2.29 | 14.67 | 0.42 | 1.48 | 0.66  | 0.75  | 1.05   |
| 91         | Cap     | 43.58    | 47.84    | 8.58     | 97.93        | 2.72            | 2.32     | 0.39  | 42.14 | 1.05 | 0.09 | 0.62 | 14.45 | 31.85 | 0.17  | 0.66 | 6.13  | 0.29 | 0.82 | 0.62  | 0.16  | 0.56   |
| 93         | Cap     | 53.14    | 21.36    | 25.5     | 96.66        | 1.5             | 16.91    | 0     | 52.4  | 0.74 | 0.24 | 2.63 | 5.98  | 11.77 | 0.34  | 0.41 | 8.82  | 0.1  | 0.36 | 15.97 | 0.11  | 0.14   |
| 95         | Cap     | 32.12    | 42.51    | 25.37    | 98.81        | 2.83            | 5.08     | 0.04  | 31.52 | 0.56 | 0.06 | 0.07 | 7.25  | 34.45 | 0.12  | 0.56 | 20.16 | 0.25 | 0.36 | 3.13  | 0.66  | 0.8    |
| 101        | Cap     | 43.61    | 35.28    | 21.11    | 79.54        | 2.22            | 14.99    | 11.18 | 32.27 | 0.16 | 0.94 | 0.82 | 5.59  | 26.53 | 0.93  | 0.47 | 6.89  | 0.15 | 6.26 | 6.38  | 1.27  | 0.16   |
| 102        | Cap     | 50.49    | 32.82    | 16.7     | 82.66        | 3.22            | 10.97    | 9.47  | 40.04 | 0.98 | 0.25 | 0.73 | 4.28  | 26.45 | 0.54  | 0.57 | 6.12  | 0.15 | 6.61 | 2.29  | 0.28  | 1.24   |
| 106        | Cap     | 66.9     | 15.5     | 17.6     | 91.06        | 5.93            | 16.36    | 1.04  | 64.82 | 1.05 | 0.13 | 1.74 | 3.36  | 8.84  | 1.13  | 0.29 | 2.14  | 0.22 | 4.49 | 6.39  | 1.55  | 2.82   |
| 108        | Cap     | 60.7     | 24.06    | 15.24    | 81.83        | 2.73            | 11.22    | 10.91 | 49.13 | 0.65 | 0.35 | 0.35 | 4.67  | 17.99 | 0.08  | 0.63 | 3.77  | 0.32 | 5.67 | 4.36  | 0.9   | 0.22   |
| 117        | Cap     | 36.93    | 48.94    | 14.13    | 97.04        | 2.95            | 3.67     | 1.46  | 34.8  | 0.67 | 0.06 | 0.8  | 14.48 | 31.36 | 0.6   | 1.64 | 10.76 | 0.3  | 0.52 | 2.2   | 0.12  | 0.23   |
| 118        | Cap     | 35.22    | 47.4     | 17.38    | 98.82        | 2.34            | 3.25     | 0.3   | 34.25 | 0.67 | 0.23 | 0.22 | 13.5  | 32.38 | 0.18  | 0.89 | 13.91 | 0.39 | 0.25 | 2.43  | 0.18  | 0.21   |
| 123        | Cap     | 51.81    | 32.53    | 15.66    | 96.16        | 4.48            | 10.12    | 1.39  | 49.11 | 1.3  | 0.09 | 0.28 | 10.25 | 19.87 | 0.68  | 1.37 | 5.97  | 0.26 | 1.19 | 6.69  | 0.89  | 0.67   |
| 137        | Cap     | 52.14    | 38.28    | 9.58     | 96.76        | 3.58            | 5.08     | 0     | 49.84 | 2.3  | 1.68 | 0.22 | 11.37 | 23.7  | 1.3   | 0.01 | 5.71  | 0.09 | 0.84 | 1.76  | 0.49  | 0.69   |
| 139        | Cap     | 43.13    | 43.41    | 13.47    | 94.75        | 4.89            | 6.32     | 0     | 41.33 | 1.8  | 2.19 | 0.8  | 11.78 | 27.49 | 1.04  | 0.12 | 7.83  | 0.35 | 0.74 | 1.92  | 1.53  | 1.1    |
| 141        | Cap     | 48.71    | 39.73    | 11.57    | 95.94        | 3.38            | 4.46     | 0     | 47.04 | 1.67 | 1.92 | 0.3  | 12.76 | 24.07 | 0.51  | 0.17 | 7.43  | 0.18 | 0.71 | 1.88  | 1.14  | 0.23   |
| 145        | Cap     | 39.22    | 48.74    | 12.04    | 96.64        | 2.87            | 3.64     | 0     | 38.01 | 1.21 | 1.9  | 0.43 | 12.11 | 33.42 | 0.77  | 0.1  | 9.12  | 0.05 | 0.39 | 0.97  | 0.64  | 0.87   |
| 146        | Cap     | 45.42    | 42.5     | 12.08    | 96.44        | 2.96            | 4.55     | 0     | 44.17 | 1.24 | 2.27 | 0.24 | 11.47 | 26.81 | 1.53  | 0.18 | 8.94  | 0.12 | 0.52 | 1.09  | 0.53  | 0.88   |

|     |         |       |       |       |       |      |       |       |       |      |      |      |       |       |      |      |       |      |      |       |      |      |
|-----|---------|-------|-------|-------|-------|------|-------|-------|-------|------|------|------|-------|-------|------|------|-------|------|------|-------|------|------|
| 148 | Cap     | 47.04 | 42.13 | 10.83 | 96.72 | 2.81 | 3.4   | 0     | 45.57 | 1.47 | 2.18 | 0.28 | 12.11 | 27    | 0.5  | 0.07 | 7.72  | 0.21 | 0.54 | 1.3   | 0.29 | 0.78 |
| 149 | Cap     | 47.6  | 39.64 | 12.75 | 95.29 | 5.92 | 5.46  | 0     | 44.74 | 2.86 | 2.2  | 0.68 | 12.87 | 22.78 | 0.98 | 0.13 | 8.18  | 0.08 | 1.07 | 0.58  | 0.75 | 2.09 |
| 152 | Cap     | 46.32 | 42.29 | 11.38 | 96.46 | 3.32 | 4.28  | 0     | 44.85 | 1.48 | 1.7  | 0.8  | 9.94  | 28.59 | 1.06 | 0.21 | 7.7   | 0.47 | 0.65 | 1.41  | 0.4  | 0.77 |
| 154 | Cap     | 50.94 | 38.84 | 10.22 | 97.15 | 1.79 | 4.31  | 0     | 50.2  | 0.74 | 2.09 | 0.27 | 12.01 | 23.31 | 1.1  | 0.05 | 6.94  | 0.08 | 0.04 | 2.24  | 0.45 | 0.47 |
| 155 | Cap     | 41.1  | 45.14 | 13.76 | 96.34 | 4.21 | 5.62  | 0     | 38.55 | 2.55 | 2.21 | 0.37 | 13.89 | 27.34 | 1.08 | 0.24 | 9.01  | 0.21 | 0.98 | 2.35  | 0.1  | 1.11 |
| 156 | Cap     | 50.47 | 37.09 | 12.44 | 94.35 | 4.34 | 4.11  | 0     | 49.05 | 1.42 | 2.02 | 0.59 | 9.12  | 25.02 | 0.34 | 0    | 8.5   | 0.16 | 0.78 | 0.23  | 2.26 | 0.5  |
|     | MAX     | 85.06 | 72.53 | 41.49 | 99.22 | 8.33 | 32.87 | 83.41 | 66.12 | 4.41 | 3.46 | 2.63 | 18.75 | 66.43 | 8.57 | 2.29 | 24.36 | 7.28 | 6.61 | 24.93 | 2.26 | 2.82 |
|     | MIN     | 8.56  | 4.34  | 8.58  | 12.86 | 0.19 | 0.64  | 0.00  | 1.62  | 0.02 | 0.02 | 0.07 | 0.02  | 0.01  | 0.01 | 0.00 | 0.40  | 0.01 | 0.01 | 0.16  | 0.01 | 0.01 |
|     | MEDIAN  | 43.58 | 42.51 | 14.64 | 96.64 | 2.81 | 6.32  | 0.22  | 40.04 | 0.75 | 0.44 | 0.69 | 8.09  | 26.81 | 0.93 | 0.21 | 7.70  | 0.18 | 0.52 | 3.13  | 0.34 | 0.41 |
|     | MEAN    | 42.34 | 41.49 | 16.17 | 93.43 | 2.98 | 8.70  | 3.45  | 37.86 | 1.03 | 0.89 | 0.74 | 8.91  | 29.16 | 1.34 | 0.43 | 8.40  | 0.41 | 0.98 | 5.29  | 0.52 | 0.58 |
|     | STD DEV | 16.21 | 13.89 | 6.19  | 13.41 | 1.79 | 6.39  | 12.93 | 15.21 | 0.85 | 0.91 | 0.53 | 4.99  | 13.75 | 1.68 | 0.59 | 5.05  | 1.09 | 1.61 | 5.34  | 0.50 | 0.56 |

| VIC Number | Epitope | Total G0 | Total G1 | Total G2 | Total Fucose | Total Bisecting | Total SA | G0   | G0F   | G0FB | G1   | G1'  | G1F   | G1F'  | G1S1F | G1FB | G2F   | G2FB | G2S1 | G2S1F | G2S1B | G2S1FB |
|------------|---------|----------|----------|----------|--------------|-----------------|----------|------|-------|------|------|------|-------|-------|-------|------|-------|------|------|-------|-------|--------|
| 16         | Fusion  | 36.3     | 44.54    | 19.17    | 96.7         | 2.02            | 15.7     | 0.3  | 35.7  | 0.3  | 0.04 | 2.45 | 15.01 | 19.7  | 7.2   | 0.14 | 9.4   | 1.27 | 0.35 | 7.85  | 0.17  | 0.13   |
| 26         | Fusion  | 33.91    | 46.4     | 19.69    | 97.75        | 1.33            | 14.01    | 0.16 | 32.84 | 0.91 | 0.56 | 1.13 | 21.3  | 18.76 | 4.64  | 0.01 | 10.07 | 0.25 | 0.33 | 8.88  | 0.07  | 0.09   |
| 47         | Fusion  | 28.57    | 49.77    | 21.66    | 97.59        | 1.48            | 15.44    | 0    | 28.2  | 0.37 | 0.33 | 1.55 | 21.17 | 20.92 | 5.75  | 0.04 | 11.57 | 0.4  | 0.17 | 8.85  | 0.35  | 0.31   |
| 75         | Fusion  | 19.14    | 49.88    | 30.98    | 94.74        | 1.91            | 26.81    | 0.01 | 18.8  | 0.33 | 0.32 | 4.21 | 12.84 | 23.91 | 8.55  | 0.05 | 11.82 | 0.9  | 0.11 | 17.52 | 0.61  | 0.01   |
| 133        | Fusion  | 52.19    | 34.63    | 13.18    | 95.24        | 4.15            | 6.74     | 1.17 | 50.06 | 0.97 | 0.05 | 2.33 | 7.45  | 23.28 | 0.04  | 1.48 | 6.12  | 0.37 | 0.43 | 4.94  | 0.78  | 0.55   |
| 142        | Fusion  | 44.7     | 43.67    | 11.63    | 97.32        | 2.44            | 2.89     | 0    | 43.7  | 1    | 2.04 | 0.02 | 12.18 | 29.11 | 0.19  | 0.13 | 8.83  | 0.11 | 0.4  | 1.09  | 0.21  | 0.99   |
| 157        | Fusion  | 59.39    | 26.41    | 14.2     | 97.26        | 2.67            | 11.38    | 0.27 | 58.18 | 0.95 | 0.4  | 0.96 | 6.79  | 17.2  | 0.69  | 0.37 | 3.18  | 0.33 | 0.5  | 9.17  | 0.62  | 0.4    |
| 158        | Fusion  | 58.14    | 27.29    | 14.57    | 96.62        | 3.14            | 9.84     | 1.11 | 55.61 | 1.42 | 0.42 | 0.94 | 7.71  | 17.13 | 0.42  | 0.68 | 4.86  | 0.28 | 0.53 | 8.15  | 0.39  | 0.36   |
|            | MAX     | 59.39    | 49.88    | 30.98    | 97.75        | 4.15            | 26.81    | 1.17 | 58.18 | 1.42 | 2.04 | 4.21 | 21.30 | 29.11 | 8.55  | 1.48 | 11.82 | 1.27 | 0.53 | 17.52 | 0.78  | 0.99   |
|            | MIN     | 19.14    | 26.41    | 11.63    | 94.74        | 1.33            | 2.89     | 0.00 | 18.80 | 0.30 | 0.04 | 0.02 | 6.79  | 17.13 | 0.04  | 0.01 | 3.18  | 0.11 | 0.11 | 1.09  | 0.07  | 0.01   |
|            | MEDIAN  | 40.50    | 44.11    | 16.87    | 96.98        | 2.23            | 12.70    | 0.22 | 39.70 | 0.93 | 0.37 | 1.34 | 12.51 | 20.31 | 2.67  | 0.14 | 9.12  | 0.35 | 0.38 | 8.50  | 0.37  | 0.34   |
|            | MEAN    | 41.54    | 40.32    | 18.14    | 96.65        | 2.39            | 12.85    | 0.38 | 40.39 | 0.78 | 0.52 | 1.70 | 13.06 | 21.25 | 3.44  | 0.36 | 8.23  | 0.49 | 0.35 | 8.31  | 0.40  | 0.36   |
|            | STD DEV | 14.51    | 9.58     | 6.28     | 1.11         | 0.93            | 7.16     | 0.49 | 13.87 | 0.40 | 0.64 | 1.28 | 5.83  | 4.05  | 3.50  | 0.50 | 3.17  | 0.39 | 0.15 | 4.63  | 0.25  | 0.31   |

| VIC Number | Epitope | Total G0 | Total G1 | Total G2 | Total Fucose | Total Bisecting | Total SA | G0    | G0F   | G0FB | G1   | G1'  | G1F   | G1F'  | G1S1F | G1FB | G2F   | G2FB | G2S1 | G2S1F | G2S1B | G2S1FB |
|------------|---------|----------|----------|----------|--------------|-----------------|----------|-------|-------|------|------|------|-------|-------|-------|------|-------|------|------|-------|-------|--------|
| 23         | GP1/2   | 31.09    | 52.57    | 16.35    | 96.58        | 3.06            | 5.35     | 0.15  | 30.57 | 0.37 | 1.24 | 1.79 | 21.66 | 25.93 | 1.74  | 0.21 | 10.88 | 1.85 | 0.02 | 2.97  | 0.22  | 0.4    |
| 50         | GP1/2   | 11.79    | 68.56    | 19.64    | 98.12        | 0.82            | 5.87     | 0.57  | 11.22 | 0.01 | 0.3  | 0.59 | 4.11  | 62.62 | 0.51  | 0.43 | 14.27 | 0.01 | 0.07 | 4.92  | 0.35  | 0.03   |
| 55         | GP1/2   | 13.95    | 54.95    | 31.1     | 98.99        | 0.55            | 14.8     | 0.15  | 13.69 | 0.11 | 0.1  | 0.67 | 10.73 | 41.39 | 2.05  | 0    | 18.14 | 0.22 | 0.08 | 12.45 | 0.02  | 0.19   |
| 72         | GP1/2   | 25.4     | 44.72    | 29.88    | 98.4         | 0.68            | 19.25    | 0.01  | 25.3  | 0.08 | 0.14 | 1.35 | 10.4  | 27.97 | 4.79  | 0.07 | 15.07 | 0.36 | 0.04 | 14.25 | 0.06  | 0.1    |
| 78         | GP1/2   | 42.82    | 46.23    | 10.95    | 84.81        | 1.18            | 5.17     | 12.95 | 29.64 | 0.24 | 0.09 | 1.59 | 6.82  | 32.77 | 4.5   | 0.46 | 10.2  | 0.08 | 0.27 | 0     | 0.3   | 0.1    |
| 107        | GP1/2   | 54.56    | 33.26    | 12.18    | 87.65        | 1.72            | 9.21     | 4.66  | 49.38 | 0.52 | 0.05 | 0.66 | 4.8   | 27.51 | 0.09  | 0.15 | 2.83  | 0.22 | 6.3  | 2     | 0.68  | 0.14   |
| 109        | GP1/2   | 46.91    | 41.67    | 11.42    | 98.49        | 2.82            | 4.81     | 0.16  | 46.12 | 0.63 | 0.69 | 0.21 | 13.89 | 25.9  | 0.2   | 0.77 | 6.42  | 0.39 | 0.22 | 3.37  | 0.22  | 0.8    |
| 111        | GP1/2   | 51.23    | 37.8     | 10.97    | 97.95        | 1.39            | 3.76     | 0.59  | 50.13 | 0.51 | 0.05 | 1.13 | 10.95 | 25.27 | 0.03  | 0.36 | 7.03  | 0.21 | 0.25 | 3.17  | 0.01  | 0.3    |
| 120        | GP1/2   | 53.24    | 32.91    | 13.85    | 97.01        | 2.7             | 5.54     | 1.89  | 50.04 | 1.31 | 0.09 | 0.67 | 8.81  | 22.33 | 0.3   | 0.71 | 8.33  | 0.27 | 0.19 | 4.65  | 0.14  | 0.26   |
| 125        | GP1/2   | 38.5     | 45.42    | 16.08    | 97.26        | 5.56            | 4.26     | 0.65  | 36.14 | 1.71 | 0.38 | 0.65 | 10.9  | 30.86 | 0.29  | 2.34 | 11.54 | 0.57 | 0.59 | 2.44  | 0.48  | 0.46   |
| 127        | GP1/2   | 26.69    | 44.29    | 29.02    | 98.97        | 6.75            | 4.55     | 0.32  | 24.88 | 1.49 | 0.09 | 0.32 | 14.61 | 25.53 | 0.2   | 3.54 | 23.79 | 0.88 | 0.25 | 3.26  | 0.05  | 0.79   |
| 132        | GP1/2   | 39.59    | 31.23    | 29.18    | 98.39        | 18.5            | 10.05    | 0.11  | 36.89 | 2.59 | 0.11 | 0.23 | 8.74  | 17.13 | 0.47  | 4.55 | 10.73 | 8.86 | 0.66 | 6.44  | 0.5   | 1.98   |
| 134        | GP1/2   | 45.84    | 34.41    | 19.76    | 98.25        | 3.23            | 5.46     | 0.85  | 44.14 | 0.85 | 0.23 | 0.21 | 7.54  | 24.9  | 0.34  | 1.18 | 14.11 | 0.52 | 0.32 | 4.13  | 0.14  | 0.54   |
| 135        | GP1/2   | 65.19    | 20.94    | 13.87    | 96.87        | 1.03            | 11.54    | 0.7   | 64.11 | 0.38 | 1.23 | 0.77 | 5.48  | 12.89 | 0.54  | 0.03 | 2.8   | 0.08 | 0.01 | 10.44 | 0.42  | 0.12   |
| 153        | GP1/2   | 47.4     | 40.46    | 12.14    | 96.36        | 2.49            | 4.12     | 0     | 46.42 | 0.99 | 1.99 | 0.39 | 10.07 | 26.96 | 0.92  | 0.12 | 8.8   | 0.15 | 0.59 | 1.37  | 0.67  | 0.56   |
|            | MAX     | 65.19    | 68.56    | 31.10    | 98.99        | 18.50           | 19.25    | 12.95 | 64.11 | 2.59 | 1.99 | 1.79 | 21.66 | 62.62 | 4.79  | 4.55 | 23.79 | 8.86 | 6.30 | 14.25 | 0.68  | 1.98   |
|            | MIN     | 11.79    | 20.94    | 10.95    | 84.81        | 0.55            | 3.76     | 0.00  | 11.22 | 0.01 | 0.05 | 0.21 | 4.11  | 12.89 | 0.03  | 0.00 | 2.80  | 0.01 | 0.01 | 0.00  | 0.01  | 0.03   |
|            | MEDIAN  | 42.82    | 41.67    | 16.08    | 97.95        | 2.49            | 5.46     | 0.57  | 36.89 | 0.52 | 0.14 | 0.66 | 10.07 | 25.93 | 0.47  | 0.43 | 10.73 | 0.27 | 0.25 | 3.37  | 0.22  | 0.30   |
|            | MEAN    | 39.61    | 41.96    | 18.43    | 96.27        | 3.50            | 7.58     | 1.58  | 37.24 | 0.79 | 0.45 | 0.75 | 9.97  | 28.66 | 1.13  | 0.99 | 11.00 | 0.98 | 0.66 | 5.06  | 0.28  | 0.45   |
|            | STD DEV | 15.21    | 11.41    | 7.62     | 4.20         | 4.51            | 4.55     | 3.36  | 14.74 | 0.72 | 0.58 | 0.50 | 4.44  | 11.38 | 1.54  | 1.39 | 5.58  | 2.23 | 1.58 | 4.14  | 0.23  | 0.49   |

| VIC Number | Epitope  | Total G0 | Total G1 | Total G2 | Total Fucose | Total Bisecting | Total SA | G0   | G0F   | G0FB | G1   | G1'  | G1F   | G1F'  | G1S1F | G1FB | G2F   | G2FB | G2S1 | G2S1F | G2S1B | G2S1FB |
|------------|----------|----------|----------|----------|--------------|-----------------|----------|------|-------|------|------|------|-------|-------|-------|------|-------|------|------|-------|-------|--------|
| 31         | GP1/Core | 26.22    | 58.52    | 15.25    | 98.56        | 3.58            | 8.87     | 0.76 | 22.86 | 2.6  | 0.1  | 0.17 | 4.16  | 52.22 | 1.55  | 0.32 | 7.88  | 0.06 | 0.12 | 6.6   | 0.3   | 0.3    |
| 33         | GP1/Core | 38.52    | 48.34    | 13.14    | 99.35        | 0.57            | 10.46    | 0.12 | 38.34 | 0.07 | 0.01 | 0.37 | 20.9  | 21.4  | 5.64  | 0.01 | 8.16  | 0.16 | 0.01 | 4.48  | 0.14  | 0.19   |
| 36         | GP1/Core | 32.79    | 50.93    | 16.28    | 98.92        | 1.31            | 10.61    | 0.02 | 32.23 | 0.53 | 0.23 | 0.61 | 23.55 | 22.3  | 4.09  | 0.16 | 9.36  | 0.39 | 0.2  | 6.1   | 0.02  | 0.2    |
| 45         | GP1/Core | 7.24     | 48.12    | 44.65    | 98.86        | 0.39            | 16.09    | 0.01 | 7.02  | 0.2  | 0.08 | 0.99 | 8.6   | 37.36 | 0.97  | 0.12 | 29.5  | 0.01 | 0.03 | 15.05 | 0.04  | 0.01   |
| 63         | GP1/Core | 66.25    | 29.66    | 4.09     | 91.85        | 2.6             | 12.43    | 6.26 | 59.64 | 0.35 | 0.29 | 0.05 | 3.9   | 14.38 | 10.68 | 0.36 | 1.98  | 0.37 | 0.22 | 0     | 1.33  | 0.19   |
| 67         | GP1/Core | 62.46    | 31.82    | 5.72     | 93.3         | 1.35            | 5.21     | 5.19 | 57.02 | 0.26 | 0.12 | 0.44 | 4.38  | 22.39 | 4.08  | 0.43 | 4.43  | 0.15 | 0.62 | 0     | 0.33  | 0.18   |
| 74         | GP1/Core | 56.81    | 25.96    | 17.22    | 97.25        | 1.56            | 25.54    | 0.05 | 55.75 | 1.01 | 0.73 | 1.41 | 7.2   | 6.6   | 9.94  | 0.09 | 1.49  | 0.13 | 0.21 | 15.05 | 0.34  | 0      |
| 83         | GP1/Core | 47.72    | 42.24    | 10.04    | 98.15        | 3.74            | 3.46     | 0.25 | 45.97 | 1.49 | 0.26 | 0.68 | 10.15 | 29.24 | 0.41  | 1.5  | 6.77  | 0.22 | 0.5  | 2.02  | 0.16  | 0.36   |
| 84         | GP1/Core | 18.76    | 51.47    | 29.77    | 96.93        | 7.47            | 10.92    | 0.87 | 17.26 | 0.62 | 0.35 | 0.05 | 10.95 | 37.12 | 0.39  | 2.6  | 18.23 | 1.02 | 0.84 | 6.47  | 0.96  | 2.26   |

|     |          |       |       |       |       |      |       |      |       |      |      |      |       |       |       |      |       |      |      |       |      |      |
|-----|----------|-------|-------|-------|-------|------|-------|------|-------|------|------|------|-------|-------|-------|------|-------|------|------|-------|------|------|
| 85  | GP1/Core | 23.16 | 52.1  | 24.73 | 97.09 | 2.45 | 2.22  | 1.48 | 21.63 | 0.06 | 0.49 | 0.21 | 15.2  | 34.74 | 0.13  | 1.33 | 22.26 | 0.38 | 0.36 | 1.05  | 0.36 | 0.31 |
| 96  | GP1/Core | 51.32 | 28.52 | 20.16 | 97.05 | 3.39 | 12.6  | 0.7  | 48.9  | 1.72 | 1.09 | 0.84 | 9.59  | 15.39 | 0.43  | 1.18 | 7.89  | 0.11 | 0.17 | 11.62 | 0.15 | 0.23 |
| 97  | GP1/Core | 42.94 | 36.73 | 20.33 | 97.4  | 3.73 | 6.26  | 0.17 | 41.16 | 1.62 | 0.48 | 1    | 9.05  | 24.69 | 0.35  | 1.16 | 13.77 | 0.65 | 0.85 | 4.75  | 0.1  | 0.21 |
| 98  | GP1/Core | 27.78 | 59.13 | 13.09 | 89.99 | 2.89 | 6.43  | 2.13 | 25.26 | 0.39 | 0.86 | 2.96 | 5.66  | 48.18 | 1.34  | 0.13 | 7.85  | 0.15 | 2.17 | 0.7   | 1.89 | 0.33 |
| 112 | GP1/Core | 33.63 | 48.38 | 17.99 | 98.56 | 2.69 | 3.41  | 0.62 | 32.42 | 0.59 | 0.04 | 0.32 | 12.49 | 34.48 | 0.14  | 0.91 | 14.31 | 0.41 | 0.23 | 2.27  | 0.24 | 0.54 |
| 113 | GP1/Core | 51.81 | 36.57 | 11.63 | 97.46 | 3.42 | 5.49  | 0.21 | 50.91 | 0.68 | 0.12 | 0.97 | 7.7   | 26.48 | 0.73  | 0.56 | 6.78  | 0.09 | 0.67 | 2     | 0.56 | 1.54 |
| 114 | GP1/Core | 28.17 | 53.36 | 18.47 | 95.63 | 3.03 | 4.88  | 1.54 | 26.24 | 0.38 | 0.29 | 1.24 | 14.73 | 34.95 | 0.95  | 1.21 | 14.46 | 0.07 | 1.02 | 1.55  | 0.29 | 1.08 |
| 115 | GP1/Core | 40.27 | 45.25 | 14.48 | 97.85 | 1.41 | 4.06  | 0.59 | 39.16 | 0.52 | 0.31 | 0.61 | 13.19 | 30.37 | 0.29  | 0.48 | 10.56 | 0.15 | 0.44 | 3.06  | 0.2  | 0.07 |
| 116 | GP1/Core | 48.26 | 38.34 | 13.4  | 98.13 | 1.8  | 4.98  | 0.08 | 47.53 | 0.65 | 0.44 | 0.9  | 9.55  | 26.52 | 0.44  | 0.49 | 8.55  | 0.3  | 0.19 | 4.01  | 0.27 | 0.08 |
| 119 | GP1/Core | 37.04 | 32.9  | 30.06 | 92.27 | 3.09 | 24.7  | 0    | 36.78 | 0.26 | 4.53 | 1.12 | 8.47  | 16.33 | 1.84  | 0.62 | 7.01  | 0.18 | 0.31 | 20.52 | 1.78 | 0.25 |
| 124 | GP1/Core | 40.81 | 42.65 | 16.54 | 96.51 | 4.38 | 7.27  | 0.88 | 38.34 | 1.58 | 0.83 | 0.88 | 12.31 | 26.99 | 0.27  | 1.36 | 9.13  | 0.41 | 0.47 | 5.51  | 0.43 | 0.6  |
| 126 | GP1/Core | 39.45 | 40.02 | 20.53 | 96.59 | 3.3  | 5.47  | 1.15 | 37.18 | 1.13 | 0.58 | 1.15 | 9.4   | 27.49 | 0.23  | 1.17 | 14.93 | 0.36 | 0.29 | 4.3   | 0.25 | 0.39 |
| 128 | GP1/Core | 54.26 | 33.79 | 11.94 | 97.33 | 6.01 | 6.13  | 0.4  | 50.9  | 2.96 | 0.29 | 1.1  | 10.65 | 19.5  | 0.38  | 1.87 | 5.84  | 0.36 | 0.68 | 4.24  | 0.2  | 0.62 |
| 129 | GP1/Core | 49.14 | 35.4  | 15.46 | 96.6  | 3.59 | 4.87  | 1.42 | 46.77 | 0.94 | 0.04 | 0.97 | 8.52  | 23.26 | 0.88  | 1.75 | 10.83 | 0.64 | 0.9  | 2.83  | 0.07 | 0.19 |
| 130 | GP1/Core | 49.23 | 35.44 | 15.33 | 97.43 | 5.17 | 5.58  | 0.72 | 46.52 | 1.99 | 0.1  | 0.77 | 7.88  | 24.19 | 0.89  | 1.6  | 10.06 | 0.58 | 0.54 | 3.16  | 0.44 | 0.55 |
| 131 | GP1/Core | 57.71 | 26.13 | 16.16 | 95.15 | 4.88 | 10.92 | 1.12 | 54.43 | 2.16 | 0.43 | 1.12 | 4.97  | 18.17 | 0.38  | 1.07 | 5.31  | 0.31 | 1.02 | 8.18  | 1.16 | 0.18 |
| 144 | GP1/Core | 43.37 | 44.24 | 12.4  | 97.71 | 3.1  | 3.87  | 0    | 41.83 | 1.54 | 1.7  | 0.11 | 13.38 | 27.73 | 1.28  | 0.04 | 9.48  | 0.32 | 0.17 | 1.22  | 0.3  | 0.9  |
| 147 | GP1/Core | 46.15 | 42.28 | 11.57 | 97.25 | 4.67 | 5.86  | 0    | 45.26 | 0.89 | 1.03 | 0.54 | 10.34 | 26.17 | 1.97  | 2.23 | 7.56  | 0.13 | 0.18 | 2.29  | 1.01 | 0.41 |
| 150 | GP1/Core | 43.45 | 43.49 | 13.06 | 96.73 | 4.56 | 4.98  | 0    | 41.25 | 2.2  | 1.79 | 0.33 | 12.64 | 27.66 | 0.9   | 0.17 | 8.92  | 0.06 | 0.14 | 1.81  | 1    | 1.12 |
| 164 | GP1/Core | 70.31 | 18.5  | 11.19 | 97.21 | 2.01 | 9.18  | 0.07 | 69.22 | 1.08 | 0.15 | 1.92 | 2.61  | 13    | 0.3   | 0.53 | 2.25  | 0.06 | 0.46 | 8.08  | 0.27 | 0.07 |
| 165 | GP1/Core | 62.36 | 26.23 | 11.41 | 98.57 | 2.52 | 8.73  | 0.51 | 61.58 | 0.78 | 0.45 | 0.52 | 7.98  | 16.19 | 0.99  | 0.1  | 2.85  | 0.82 | 0.12 | 6.8   | 0.34 | 0.48 |
| 166 | GP1/Core | 74.76 | 15.77 | 9.47  | 99    | 1.81 | 8.28  | 0.24 | 73.82 | 0.93 | 0.11 | 0.76 | 3.93  | 9.94  | 0.39  | 0.65 | 1.57  | 0.01 | 0.02 | 7.65  | 0.11 | 0.12 |
| 168 | GP1/Core | 62.88 | 25.72 | 11.4  | 97.93 | 2.49 | 12.58 | 0.98 | 61.66 | 1.21 | 0.42 | 1.15 | 7.69  | 13.67 | 2.36  | 0.43 | 1.08  | 0.11 | 0.14 | 9.33  | 0.36 | 0.38 |
|     | MAX      | 74.76 | 59.13 | 44.65 | 99.35 | 7.47 | 25.54 | 6.26 | 73.82 | 2.96 | 4.53 | 2.96 | 23.55 | 52.22 | 10.68 | 2.60 | 29.50 | 1.02 | 2.17 | 20.52 | 1.89 | 2.26 |
|     | MIN      | 7.24  | 15.77 | 4.09  | 89.99 | 0.39 | 2.22  | 0.00 | 7.02  | 0.06 | 0.01 | 0.05 | 2.61  | 6.60  | 0.13  | 0.01 | 1.08  | 0.01 | 0.01 | 0.00  | 0.02 | 0.00 |
|     | MEDIAN   | 44.80 | 39.18 | 14.87 | 97.29 | 3.06 | 6.35  | 0.55 | 43.55 | 0.91 | 0.33 | 0.81 | 9.23  | 25.43 | 0.89  | 0.59 | 8.03  | 0.20 | 0.30 | 4.27  | 0.30 | 0.31 |
|     | MEAN     | 44.84 | 39.00 | 16.16 | 96.83 | 3.09 | 8.51  | 0.89 | 42.96 | 1.04 | 0.59 | 0.82 | 9.74  | 25.28 | 1.74  | 0.83 | 9.10  | 0.29 | 0.45 | 5.40  | 0.48 | 0.45 |
|     | STD DEV  | 15.47 | 11.11 | 7.72  | 2.17  | 1.55 | 5.46  | 1.39 | 15.13 | 0.75 | 0.84 | 0.58 | 4.63  | 10.22 | 2.59  | 0.69 | 6.16  | 0.24 | 0.43 | 4.76  | 0.49 | 0.48 |

| VIC Number | Epitope  | Total G0 | Total G1 | Total G2 | Total Fucose | Total Bisecting | Total SA | G0   | G0F   | G0FB | G1   | G1'  | G1F   | G1F'  | G1S1F | G1FB | G2F   | G2FB | G2S1 | G2S1F | G2S1B | G2S1FB |
|------------|----------|----------|----------|----------|--------------|-----------------|----------|------|-------|------|------|------|-------|-------|-------|------|-------|------|------|-------|-------|--------|
| 10         | GP1/Head | 56.72    | 24.49    | 18.79    | 96.89        | 2.81            | 27.47    | 0.09 | 55.88 | 0.75 | 0.42 | 0.4  | 5.27  | 8.36  | 10.02 | 0.01 | 1.19  | 0.15 | 0.35 | 15.2  | 1.85  | 0.05   |
| 94         | GP1/Head | 43       | 32.68    | 24.32    | 97.87        | 2.7             | 13.37    | 0    | 42.32 | 0.68 | 0.36 | 0.65 | 7.74  | 22.52 | 0.66  | 0.75 | 11.38 | 0.23 | 0.46 | 11.22 | 0.66  | 0.37   |
| 122        | GP1/Head | 49.19    | 36.65    | 14.16    | 97.76        | 1.6             | 10.53    | 0.18 | 48.57 | 0.43 | 1.29 | 0.18 | 10.31 | 24.5  | 0.3   | 0.08 | 3.77  | 0.15 | 0.05 | 9.25  | 0.53  | 0.4    |
| 138        | GP1/Head | 43.74    | 42.97    | 13.28    | 96.34        | 2.76            | 3.72     | 0    | 43.51 | 0.23 | 2.37 | 0.23 | 13.96 | 26.16 | 0.14  | 0.1  | 9.44  | 0.27 | 0.23 | 1.19  | 0.83  | 1.33   |
| 160        | GP1/Head | 73.76    | 15.69    | 10.55    | 98.5         | 1.95            | 8.28     | 0.06 | 72.3  | 1.4  | 0.15 | 0.91 | 3.06  | 11.36 | 0.16  | 0.06 | 2.28  | 0.14 | 0.29 | 7.48  | 0.09  | 0.27   |
| 167        | GP1/Head | 66.81    | 19.22    | 13.96    | 96.17        | 2.82            | 11.35    | 0.29 | 65.57 | 1.24 | 0.2  | 2.34 | 5.76  | 10.41 | 0.08  | 0.43 | 2.15  | 0.54 | 1.02 | 9.65  | 0.28  | 0.33   |
|            | MAX      | 73.76    | 42.97    | 24.32    | 98.50        | 2.82            | 27.47    | 0.29 | 72.30 | 1.40 | 2.37 | 2.34 | 13.96 | 26.16 | 10.02 | 0.75 | 11.38 | 0.54 | 1.02 | 15.20 | 1.85  | 1.33   |
|            | MIN      | 43.00    | 15.69    | 10.55    | 96.17        | 1.60            | 3.72     | 0.00 | 42.32 | 0.23 | 0.15 | 0.18 | 3.06  | 8.36  | 0.08  | 0.01 | 1.19  | 0.14 | 0.05 | 1.19  | 0.09  | 0.05   |
|            | MEDIAN   | 52.96    | 28.59    | 14.06    | 97.33        | 2.73            | 10.94    | 0.08 | 52.23 | 0.72 | 0.39 | 0.53 | 6.75  | 16.94 | 0.23  | 0.09 | 3.03  | 0.19 | 0.32 | 9.45  | 0.60  | 0.35   |
|            | MEAN     | 55.54    | 28.62    | 15.84    | 97.26        | 2.44            | 12.45    | 0.10 | 54.69 | 0.79 | 0.80 | 0.79 | 7.68  | 17.22 | 1.89  | 0.24 | 5.04  | 0.25 | 0.40 | 9.00  | 0.71  | 0.46   |
|            | STD DEV  | 12.63    | 10.58    | 4.93     | 0.93         | 0.53            | 8.06     | 0.11 | 12.21 | 0.45 | 0.87 | 0.81 | 3.93  | 8.00  | 3.99  | 0.29 | 4.29  | 0.15 | 0.33 | 4.63  | 0.62  | 0.44   |

| VIC Number | Epitope | Total G0 | Total G1 | Total G2 | Total Fucose | Total Bisecting | Total SA | G0    | G0F   | G0FB | G1   | G1'  | G1F   | G1F'  | G1S1F | G1FB | G2F  | G2FB | G2S1  | G2S1F | G2S1B | G2S1FB |
|------------|---------|----------|----------|----------|--------------|-----------------|----------|-------|-------|------|------|------|-------|-------|-------|------|------|------|-------|-------|-------|--------|
| 42         | HR2     | 28.27    | 59.17    | 12.56    | 98.28        | 1.55            | 16.44    | 0.16  | 27.45 | 0.66 | 0.66 | 0.44 | 21.35 | 25.51 | 11.05 | 0.16 | 6.84 | 0.34 | 0.18  | 4.8   | 0.27  | 0.13   |
| 100        | HR2     | 57.91    | 26.88    | 15.21    | 81.23        | 0.79            | 10.64    | 0.14  | 47.53 | 0.25 | 0.88 | 0.8  | 4.28  | 19.98 | 0.74  | 0.2  | 5.16 | 0.13 | 6.86  | 2.84  | 0.08  | 0.12   |
| 103        | HR2     | 44.21    | 31.05    | 24.74    | 73.59        | 3.15            | 18.23    | 13.43 | 29.96 | 0.82 | 0.5  | 0.16 | 6.23  | 21.64 | 2.19  | 0.32 | 8.06 | 0.64 | 11.67 | 3.01  | 0.65  | 0.71   |
| 104        | HR2     | 46.72    | 32.36    | 20.91    | 70.89        | 5.55            | 17.61    | 18.05 | 27.61 | 1.07 | 0.61 | 0.24 | 5     | 22.78 | 3.25  | 0.49 | 6.26 | 0.29 | 8.45  | 2.21  | 1.77  | 1.93   |
| 161        | HR2     | 72.8     | 18.47    | 8.73     | 97.68        | 2.16            | 8.18     | 0.07  | 71.9  | 0.91 | 0.56 | 0.78 | 6.03  | 10.73 | 0.03  | 0.35 | 0.49 | 0.09 | 0.48  | 6.85  | 0.5   | 0.32   |
| 162        | HR2     | 57.43    | 28.14    | 14.42    | 98.31        | 1.55            | 9.16     | 0.85  | 56.99 | 0.45 | 0.24 | 0.91 | 7.89  | 18.4  | 0.14  | 0.58 | 5.35 | 0.05 | 0.4   | 8.15  | 0.15  | 0.32   |
| 163        | HR2     | 67.05    | 21.15    | 11.79    | 98.1         | 1.95            | 9.86     | 0.28  | 65.96 | 1.09 | 0.15 | 1.17 | 6.14  | 13.21 | 0.04  | 0.44 | 1.85 | 0.12 | 0.27  | 9.25  | 0.3   | 0.01   |
| 171        | HR2     | 65.51    | 24.24    | 10.25    | 98.64        | 0.86            | 8.51     | 0.18  | 65.41 | 0.1  | 0.06 | 0.96 | 7.05  | 15.29 | 0.43  | 0.45 | 2.05 | 0.12 | 0.33  | 7.55  | 0.01  | 0.18   |
|            | MAX     | 72.80    | 59.17    | 24.74    | 98.64        | 5.55            | 18.23    | 18.05 | 71.90 | 1.09 | 0.88 | 1.17 | 21.35 | 25.51 | 11.05 | 0.58 | 8.06 | 0.64 | 11.67 | 9.25  | 1.77  | 1.93   |
|            | MIN     | 28.27    | 18.47    | 8.73     | 70.89        | 0.79            | 8.18     | 0.07  | 27.45 | 0.10 | 0.06 | 0.16 | 4.28  | 10.73 | 0.03  | 0.16 | 0.49 | 0.05 | 0.18  | 2.21  | 0.01  | 0.01   |
|            | MEDIAN  | 57.67    | 27.51    | 13.49    | 97.89        | 1.75            | 10.25    | 0.57  | 52.26 | 0.74 | 0.53 | 0.79 | 6.19  | 19.19 | 0.59  | 0.40 | 5.26 | 0.13 | 0.44  | 5.83  | 0.29  | 0.25   |
|            | MEAN    | 54.99    | 30.18    | 14.83    | 89.59        | 2.20            | 12.33    | 5.40  | 49.10 | 0.67 | 0.46 | 0.68 | 8.00  | 18.44 | 2.23  | 0.37 | 4.51 | 0.22 | 3.58  | 5.58  | 0.47  | 0.47   |
|            | STD DEV | 14.57    | 12.62    | 5.45     | 12.23        | 1.55            | 4.32     | 7.34  | 18.64 | 0.37 | 0.28 | 0.36 | 5.51  | 5.04  | 3.75  | 0.14 | 2.71 | 0.20 | 4.67  | 2.72  | 0.57  | 0.63   |

| VIC Number | Epitope | Total G0 | Total G1 | Total G2 | Total Fucose | Total Bisecting | Total SA | G0    | G0F   | G0FB | G1   | G1'  | G1F  | G1F'  | G1S1F | G1FB | G2F  | G2FB | G2S1 | G2S1F | G2S1B | G2S1FB |
|------------|---------|----------|----------|----------|--------------|-----------------|----------|-------|-------|------|------|------|------|-------|-------|------|------|------|------|-------|-------|--------|
| 2          | Mucin   | 72.1     | 17.31    | 10.59    | 56.49        | 1.31            | 11.21    | 40.39 | 31.35 | 0.36 | 0.43 | 0.61 | 2.53 | 10.23 | 3.26  | 0.26 | 2.58 | 0.06 | 1.64 | 5.69  | 0.44  | 0.18   |
| 4          | Mucin   | 88.83    | 2.71     | 8.47     | 12.47        | 1.85            | 6.78     | 83.24 | 5.18  | 0.41 | 0.17 | 1.29 | 0.15 | 0.21  | 0.84  | 0.06 | 2.35 | 0.18 | 2.03 | 2.69  | 0.81  | 0.41   |

|     |         |       |       |       |       |      |       |       |       |      |      |       |       |       |       |      |       |      |      |       |      |      |
|-----|---------|-------|-------|-------|-------|------|-------|-------|-------|------|------|-------|-------|-------|-------|------|-------|------|------|-------|------|------|
| 6   | Mucin   | 61.53 | 25.17 | 13.3  | 98.24 | 0.77 | 13.53 | 0.26  | 60.83 | 0.44 | 0.37 | 0.45  | 2.06  | 20.82 | 1.45  | 0.03 | 1.19  | 0.03 | 0.42 | 11.39 | 0.27 | 0    |
| 9   | Mucin   | 23.28 | 49.07 | 27.65 | 98.34 | 0.42 | 30.24 | 0.06  | 23.18 | 0.05 | 0.27 | 1.1   | 13.18 | 22.11 | 12.39 | 0.01 | 9.78  | 0.02 | 0.03 | 17.48 | 0.2  | 0.14 |
| 21  | Mucin   | 36.58 | 52.34 | 11.08 | 96.83 | 0.91 | 6.63  | 0.51  | 36.02 | 0.06 | 0.38 | 1.95  | 4.71  | 43.53 | 1.65  | 0.1  | 5.81  | 0.29 | 0.24 | 4.28  | 0.08 | 0.38 |
| 22  | Mucin   | 54.19 | 40.2  | 5.62  | 98.06 | 1.09 | 2.71  | 0.17  | 53.53 | 0.49 | 0.57 | 0.67  | 4.99  | 33.09 | 0.66  | 0.22 | 3.34  | 0.23 | 0.51 | 1.38  | 0.01 | 0.15 |
| 27  | Mucin   | 20.74 | 65.8  | 13.46 | 98.96 | 2.55 | 5.83  | 0.09  | 19.14 | 1.51 | 0.33 | 0.26  | 7.32  | 56.42 | 1.36  | 0.11 | 8.64  | 0.36 | 0.25 | 3.64  | 0.11 | 0.46 |
| 28  | Mucin   | 26.9  | 55.04 | 18.06 | 98.08 | 2.05 | 6.66  | 0.16  | 25.42 | 1.32 | 0.64 | 0.77  | 19.32 | 31.52 | 2.66  | 0.12 | 13.85 | 0.2  | 0.12 | 3.48  | 0.22 | 0.18 |
| 37  | Mucin   | 17.45 | 58.39 | 24.16 | 93.52 | 3.69 | 17.94 | 0.26  | 16.96 | 0.23 | 0.86 | 3.5   | 8.21  | 37.59 | 5.92  | 2.31 | 11.72 | 0.42 | 1.35 | 9.95  | 0.52 | 0.21 |
| 38  | Mucin   | 8.33  | 58.66 | 33.02 | 98.4  | 0.81 | 10.48 | 0.27  | 8.02  | 0.03 | 0.33 | 0.61  | 6.23  | 49.71 | 1.75  | 0.03 | 24.04 | 0.24 | 0.29 | 7.94  | 0.1  | 0.41 |
| 40  | Mucin   | 35.9  | 51.71 | 12.39 | 80.26 | 3.44 | 9.75  | 0.09  | 33.8  | 2    | 0.66 | 15.46 | 4.88  | 30.35 | 0.25  | 0.1  | 2.75  | 0.15 | 2.33 | 5.98  | 1.19 | 0    |
| 41  | Mucin   | 13.07 | 66.15 | 20.78 | 98.78 | 0.53 | 6.49  | 0.29  | 12.65 | 0.14 | 0.13 | 0.6   | 5.19  | 60.04 | 0.04  | 0.14 | 14.27 | 0.05 | 0.17 | 6.08  | 0.04 | 0.16 |
| 44  | Mucin   | 15.36 | 63.01 | 21.64 | 97.07 | 3.43 | 9.39  | 0.89  | 12.58 | 1.88 | 0.32 | 1.28  | 3.86  | 56.46 | 0.96  | 0.13 | 13.18 | 0.02 | 0.1  | 6.93  | 0.33 | 1.06 |
| 46  | Mucin   | 18.83 | 64.63 | 16.54 | 97.91 | 1.89 | 4.83  | 0.3   | 17.44 | 1.09 | 0.1  | 0.96  | 4.6   | 58.23 | 0.72  | 0.02 | 12.41 | 0.02 | 0.28 | 3.07  | 0.45 | 0.31 |
| 48  | Mucin   | 24.69 | 44.29 | 31.02 | 97.61 | 2.02 | 14.27 | 0.13  | 23.92 | 0.65 | 0.22 | 0.96  | 8.87  | 31.73 | 2.48  | 0.02 | 18.93 | 0.3  | 0.13 | 10.6  | 0.94 | 0.11 |
| 51  | Mucin   | 18.34 | 64.16 | 17.5  | 96.51 | 1.74 | 2.82  | 1.07  | 16.08 | 1.2  | 0.24 | 1.85  | 3.99  | 57.78 | 0.22  | 0.08 | 14.8  | 0.11 | 0.19 | 2.06  | 0.15 | 0.21 |
| 54  | Mucin   | 14.11 | 65.64 | 20.25 | 97.31 | 2.97 | 7.6   | 0.27  | 11.68 | 2.17 | 0.52 | 1.18  | 3.25  | 59.56 | 1.01  | 0.12 | 13.66 | 0.01 | 0.28 | 5.63  | 0.44 | 0.24 |
| 70  | Mucin   | 55.99 | 30.79 | 13.22 | 96.95 | 1.46 | 9.62  | 0.92  | 55.04 | 0.03 | 0.12 | 0.49  | 6.85  | 22.29 | 0.4   | 0.64 | 3.95  | 0.04 | 1    | 7.46  | 0.52 | 0.24 |
| 99  | Mucin   | 46.98 | 45.08 | 7.94  | 96.63 | 1.59 | 3.5   | 1.39  | 45.16 | 0.43 | 0.18 | 0.54  | 5.05  | 39    | 0.06  | 0.24 | 4.44  | 0.06 | 0.86 | 1.72  | 0.4  | 0.45 |
| 143 | Mucin   | 50.62 | 35.38 | 14    | 96.81 | 2.3  | 3.17  | 0     | 49.84 | 0.78 | 1.88 | 0.32  | 11.41 | 21.42 | 0.28  | 0.07 | 11.01 | 0.1  | 0.1  | 1.43  | 0.89 | 0.47 |
|     | MAX     | 88.83 | 66.15 | 33.02 | 98.96 | 3.69 | 30.24 | 83.24 | 60.83 | 2.17 | 1.88 | 15.46 | 19.32 | 60.04 | 12.39 | 2.31 | 24.04 | 0.42 | 2.33 | 17.48 | 1.19 | 1.06 |
|     | MIN     | 8.33  | 2.71  | 5.62  | 12.47 | 0.42 | 2.71  | 0.00  | 5.18  | 0.03 | 0.10 | 0.26  | 0.15  | 0.21  | 0.04  | 0.01 | 1.19  | 0.01 | 0.03 | 1.38  | 0.01 | 0.00 |
|     | MEDIAN  | 25.80 | 52.03 | 15.27 | 97.19 | 1.80 | 7.19  | 0.27  | 23.55 | 0.47 | 0.33 | 0.87  | 5.02  | 35.34 | 0.99  | 0.11 | 10.40 | 0.11 | 0.28 | 5.66  | 0.37 | 0.23 |
|     | MEAN    | 35.19 | 47.78 | 17.03 | 90.26 | 1.84 | 9.17  | 6.54  | 27.89 | 0.76 | 0.44 | 1.74  | 6.33  | 37.10 | 1.92  | 0.24 | 9.64  | 0.14 | 0.62 | 5.94  | 0.41 | 0.29 |
|     | STD DEV | 22.42 | 17.88 | 7.60  | 20.76 | 0.99 | 6.41  | 20.15 | 17.02 | 0.70 | 0.40 | 3.31  | 4.34  | 17.79 | 2.83  | 0.51 | 6.24  | 0.13 | 0.69 | 4.07  | 0.33 | 0.23 |

| VIC Number | Epitope | Total G0 | Total G1 | Total G2 | Total Fucose | Total Bisecting | Total SA | G0   | G0F   | G0FB | G1   | G1'  | G1F   | G1F'  | G1S1F | G1FB | G2F   | G2FB | G2S1 | G2S1F | G2S1B | G2S1FB |
|------------|---------|----------|----------|----------|--------------|-----------------|----------|------|-------|------|------|------|-------|-------|-------|------|-------|------|------|-------|-------|--------|
| 7          | Unknown | 68.6     | 22.92    | 8.48     | 97.79        | 1.66            | 12.87    | 0.56 | 67.71 | 0.33 | 0.33 | 0.04 | 6.73  | 10.13 | 5.62  | 0.06 | 1.18  | 0.06 | 0.09 | 5.93  | 1.19  | 0.03   |
| 13         | Unknown | 67.42    | 20.87    | 11.7     | 96.41        | 3.1             | 11.02    | 0.28 | 66.11 | 1.03 | 1.36 | 0.92 | 1.94  | 14.99 | 1.07  | 0.59 | 1.26  | 0.5  | 0.57 | 8.4   | 0.46  | 0.52   |
| 17         | Unknown | 30.91    | 39.65    | 29.44    | 95.57        | 3.71            | 31.3     | 0.04 | 28.51 | 2.37 | 2.28 | 1.11 | 9.95  | 16.42 | 9.15  | 0.74 | 7.26  | 0.04 | 0.76 | 20.82 | 0.25  | 0.31   |
| 19         | Unknown | 43.87    | 48.99    | 7.14     | 98.01        | 1.38            | 6.25     | 0.21 | 43.6  | 0.06 | 0.16 | 1.31 | 5.37  | 40.02 | 1.72  | 0.41 | 2.31  | 0.3  | 0.18 | 3.74  | 0.13  | 0.47   |
| 29         | Unknown | 18.32    | 44.15    | 37.53    | 98.89        | 0.93            | 13.95    | 0    | 17.99 | 0.32 | 0.18 | 0.81 | 12.61 | 29.42 | 1.1   | 0.03 | 24.37 | 0.31 | 0.07 | 12.52 | 0.04  | 0.22   |
| 30         | Unknown | 36.55    | 47.97    | 15.48    | 94.31        | 4.8             | 10.32    | 0.44 | 33.48 | 2.63 | 1.31 | 1.85 | 5.27  | 38.3  | 0.49  | 0.76 | 5.54  | 0.12 | 1.34 | 7.19  | 0.75  | 0.54   |
| 34         | Unknown | 34.39    | 44.61    | 21       | 97.08        | 1.48            | 19.32    | 0.29 | 33.48 | 0.62 | 0.28 | 1.91 | 14.44 | 20.47 | 7.46  | 0.06 | 8.93  | 0.21 | 0.17 | 11.1  | 0.27  | 0.32   |
| 49         | Unknown | 8.76     | 50.18    | 41.06    | 95.34        | 0.98            | 9.52     | 1.9  | 6.57  | 0.29 | 0.35 | 0.78 | 7.27  | 41.18 | 0.55  | 0.04 | 32.05 | 0.04 | 1.11 | 7.25  | 0.51  | 0.09   |
| 53         | Unknown | 22.89    | 56.84    | 20.27    | 98.25        | 3.45            | 11.41    | 0.17 | 20.11 | 2.61 | 0.15 | 0.85 | 4.63  | 50.18 | 0.92  | 0.12 | 9.72  | 0.06 | 0.05 | 9.77  | 0.52  | 0.14   |
| 57         | Unknown | 32.62    | 50.96    | 16.43    | 98.63        | 1.71            | 12.14    | 0.23 | 31.08 | 1.3  | 0.58 | 0.34 | 4.51  | 44.54 | 0.83  | 0.17 | 5.1   | 0.02 | 0.06 | 11.02 | 0.15  | 0.07   |
| 60         | Unknown | 19.9     | 59.37    | 20.73    | 98.64        | 0.48            | 7.08     | 0.24 | 19.55 | 0.11 | 0.07 | 0.61 | 10.66 | 46.15 | 1.74  | 0.14 | 15.36 | 0.03 | 0.26 | 4.88  | 0.17  | 0.03   |
| 66         | Unknown | 65.02    | 18.83    | 16.14    | 95.89        | 1.23            | 17.65    | 1.69 | 63.12 | 0.22 | 0.49 | 0.7  | 3.78  | 10    | 3.79  | 0.06 | 2.06  | 0.22 | 0.83 | 12.31 | 0.4   | 0.33   |
| 68         | Unknown | 66.7     | 23.75    | 9.55     | 96.94        | 2.09            | 8.25     | 0.07 | 65.93 | 0.69 | 0.28 | 0.29 | 8.09  | 13.12 | 1.4   | 0.57 | 2.68  | 0.02 | 1.92 | 4.12  | 0.5   | 0.3    |
| 69         | Unknown | 40.58    | 26.34    | 33.08    | 94.16        | 6.48            | 26.32    | 0.08 | 39.27 | 1.23 | 1.34 | 2.25 | 6.82  | 13.51 | 1.52  | 0.92 | 6.58  | 1.69 | 2.11 | 20.05 | 0.08  | 2.56   |
| 86         | Unknown | 21       | 39.76    | 39.24    | 94.82        | 7.04            | 5.6      | 1.67 | 18.47 | 0.86 | 0.7  | 0.81 | 9.78  | 25.6  | 0.34  | 2.53 | 33.3  | 0.69 | 0.95 | 1.33  | 1.05  | 1.92   |
| 87         | Unknown | 13.56    | 43.92    | 42.53    | 90.79        | 8.51            | 12.15    | 1.65 | 10.3  | 1.61 | 0.24 | 0.48 | 12.92 | 27.22 | 0.14  | 2.93 | 30.3  | 0.22 | 4.09 | 4.17  | 2.76  | 0.99   |
| 89         | Unknown | 17.39    | 47.78    | 34.84    | 95.32        | 5.37            | 2.3      | 2.04 | 14.1  | 1.25 | 1.21 | 0.49 | 15.04 | 27.89 | 0.11  | 3.03 | 32.14 | 0.51 | 0.74 | 0.87  | 0.19  | 0.39   |
| 92         | Unknown | 39.17    | 47.42    | 13.41    | 94.57        | 3.87            | 1.99     | 3.35 | 35    | 0.82 | 0.52 | 0.7  | 18.34 | 25.52 | 0.14  | 2.2  | 11.13 | 0.43 | 0.65 | 0.78  | 0.21  | 0.2    |
| 105        | Unknown | 60.53    | 27.28    | 12.2     | 87.62        | 1.69            | 7.35     | 6.2  | 53.8  | 0.52 | 0.18 | 0.33 | 6.45  | 19.73 | 0.35  | 0.23 | 5.09  | 0.1  | 4.88 | 1.29  | 0.79  | 0.04   |
| 110        | Unknown | 46.37    | 39.82    | 13.81    | 97.02        | 2.15            | 7.26     | 0.61 | 45.2  | 0.56 | 1.24 | 0.35 | 12.64 | 24.38 | 0.51  | 0.71 | 6.89  | 0.17 | 0.33 | 5.71  | 0.45  | 0.26   |
| 121        | Unknown | 46.38    | 37.11    | 16.51    | 97.2         | 4.35            | 7.16     | 0.74 | 43.89 | 1.75 | 0.18 | 0.95 | 11.25 | 22.45 | 0.62  | 1.65 | 9.73  | 0.24 | 0.48 | 5.36  | 0.44  | 0.26   |
| 151        | Unknown | 38.82    | 47.55    | 13.63    | 95.95        | 3.03            | 4.59     | 0    | 37.56 | 1.26 | 2.64 | 0.08 | 11.55 | 32.64 | 0.47  | 0.16 | 9.33  | 0.18 | 0.59 | 2.1   | 0.74  | 0.68   |
|            | MAX     | 68.60    | 59.37    | 42.53    | 98.89        | 8.51            | 31.30    | 6.20 | 67.71 | 2.63 | 2.64 | 2.25 | 18.34 | 50.18 | 9.15  | 3.03 | 33.30 | 1.69 | 4.88 | 20.82 | 2.76  | 2.56   |
|            | MIN     | 8.76     | 18.83    | 7.14     | 87.62        | 0.48            | 1.99     | 0.00 | 6.57  | 0.06 | 0.07 | 0.04 | 1.94  | 10.00 | 0.11  | 0.03 | 1.18  | 0.02 | 0.05 | 0.78  | 0.04  | 0.03   |
|            | MEDIAN  | 37.69    | 44.04    | 16.47    | 96.18        | 2.59            | 9.92     | 0.37 | 34.24 | 0.84 | 0.42 | 0.74 | 8.94  | 25.56 | 0.88  | 0.49 | 8.10  | 0.20 | 0.62 | 5.82  | 0.45  | 0.31   |
|            | MEAN    | 38.17    | 40.28    | 21.55    | 95.87        | 3.16            | 11.17    | 1.02 | 36.13 | 1.02 | 0.73 | 0.82 | 9.09  | 26.99 | 1.82  | 0.82 | 11.92 | 0.28 | 1.01 | 7.31  | 0.55  | 0.49   |
|            | STD DEV | 18.58    | 11.91    | 11.50    | 2.65         | 2.18            | 7.21     | 1.46 | 18.69 | 0.78 | 0.71 | 0.58 | 4.22  | 12.11 | 2.47  | 0.98 | 10.94 | 0.36 | 1.26 | 5.62  | 0.58  | 0.62   |

Table S4. Antibody features ranked by importance for predicting likelihood of protection, related to Figure 7.

| <b>Rank</b> | <b>Importance</b> | <b>Feature</b>                          |
|-------------|-------------------|-----------------------------------------|
| 1           | 0.237483          | IIP unneutralized fraction of rVSV-EBOV |
| 2           | 0.176860          | Log <sub>10</sub> rVSV IC <sub>50</sub> |
| 3           | 0.128681          | IIP authentic EBOV neutralization       |
| 4           | 0.056267          | IIP ΔVP30 EBOV neutralization           |
| 5           | 0.022053          | Polyfunctionality                       |
| 6           | 0.019130          | Total SA                                |
| 7           | 0.018971          | G1                                      |
| 8           | 0.018086          | CD107a                                  |
| 9           | 0.018039          | IFN-γ                                   |
| 10          | 0.017258          | Log <sub>10</sub> GP EC <sub>50</sub>   |
| 11          | 0.014427          | G2S1F                                   |
| 12          | 0.013914          | MIP-1B                                  |

The importance factors for different antibody features determined from Random Forest regression predictions for protection of mice (Pedregosa et al., 2011). The 10-fold cross-validation of RF predictions are shown in Figure S7.

Website: The correlation network may be accessed at: <https://apps.andersen-lab.com/cornnetwork/>
